# Supplementary material
Source: Research Square preprint supplement (doi:10.21203/rs.3.rs-9510758/v1)
Supplement: Supplementary file 1 [file 5c350fd94acde98c36b4841d.pdf]

1                   Supplementary Material for “[Prospective  
2                   Real-Time Slow Slip Events Forecasting”

3                   Adriano Gualandi<sup>1\*</sup>, Matthieu Darcy<sup>2</sup> and Fabio Corbi<sup>3</sup>

4                   <sup>1\*</sup>Bullard Laboratories, Department of Earth Sciences, University of  
5                   Cambridge, Madingley Rise, Madingley Road, Cambridge, CB3 0EZ,  
6                   United Kingdom.

7                   <sup>2</sup>Division of Engineering and Applied Science, Department of Computing  
8                   and Mathematical Sciences, California Institute of Technology, 1200, E.  
9                   California Blvd, Pasadena, 91125, CA, United States of America.

10                  <sup>3</sup>Istituto di Geologia Ambientale e Geoingegneria – CNR, Dipartimento  
11                  di Scienze della Terra,, Sapienza Università di Roma, Piazzale Aldo  
12                  Moro, 5, Rome, 00185, Italy.

13                  \*Corresponding author(s). E-mail(s): [ag2347@cam.ac.uk](mailto:ag2347@cam.ac.uk);

14                  **Introduction**

15                  Section [S1](#) presents the data used in this study. It is subdivided into two subsection  
16                  to cover both geodetic and seismic data.

17                  Section [S2](#) presents an automatic SSE detection algorithm, used to visualize the  
18                  segmentation of the Cascadia subduction zone.

19                  Section [S3](#) offers a description of the physical intuition behind the modelling  
20                  strategy.

21 Section [S4](#) introduces the various forecasting models, both deterministic and  
22 probabilistic.

23 In section [S5](#) we describe the evaluation metrics.

24 This files contains 5 Figures, 11 Tables, and the description of the Movie S1.

## 25 S1 Data

### 26 S1.1 Geodetic data

27 The geodetic input data is the slip potency with respect to the long-term loading ( $P$ )  
28 as described in [1]. Here we refer to it as slip potency, implying that it is the slip  
29 potency derived from detrended time series, i.e. referring to variations with respect to  
30 the long-term trend. For every patch  $j$  and time  $n$ , the slip potency  $P_{jn}$  is equal to  
31  $A_j\delta_{jn}$ , where  $A_j$  is the slipping area for the patch  $j$  that slipped an amount  $\delta_{jn}$  at  
32 time  $n$  with respect to the long-term value. Under the assumption of constant shear  
33 modulus  $\mu$ ,  $P_{jn}$  is proportional to the seismic moment associated with the patch  $j$ .  
34 The seismic moment is logarithmically related to the equivalent moment magnitude,  
35 and is a standard quantity to effectively measure the size of a slipping event [2, 3].  $\delta_{jn}$   
36 is already the result of several processing assumptions, and it is derived from GNSS  
37 position time series. The most relevant information and assumptions are the following:

- 38 • The GNSS position time series from EarthScope (<https://www.earthscope.org>)  
39 include both final and rapid solutions, with data available up to 2 days before the  
40 current date.
- 41 • The time series are detrended and corrected for instrumental and co-seismic offsets.  
42 The removal of a linear trend implies that the displacements are relative to the  
43 long-term motion.
- 44 • The dataset is decomposed in independent components (ICs), and those relative to  
45 SSEs are automatically selected analyzing both their spatial distribution and the  
46 power spectrum of their time evolution. The number of ICs is automatically selected  
47 thanks to a variational Bayesian approach, and it can change from one day to the  
48 next depending on the input dataset.
- 49 • The spatial distribution of the selected ICs is inverted on a triangular mesh [4] using  
50 a half-space elastic solution [5] to find the corresponding pattern on the fault. The

51 regularization parameter is automatically selected via a leave-one-out procedure [6,  
52 7].

- 53 • The spatial distributions on the fault are recombined with the corresponding  
54 temporal evolutions to retrieve the full slip spatio-temporal history.
- 55 • The slip spatio-temporal history is multiplied by the area of the slipping patches to  
56 obtain the slip potency spatio-temporal history.

57 The above procedure is repeated every day starting from 2024/08/01. This means  
58 that we have a collection of solutions from 2024/08/01 to two days ago, each giving a  
59 slip potency spatio-temporal matrix of size  $2M \times N_t$ , where  $M = 3339$  is the number  
60 of patches used to discretize the fault, and  $N_t$  is the number of observed epochs from  
61 2007/01/01 up to the time  $t$  at which the analysis is conducted. For each patch we  
62 have access to the slip potency along both strike and dip, but, since we are studying  
63 a subduction zone, we decide to use only the along-dip information because it is one  
64 order of magnitude larger and provides a higher signal-to-noise ratio. The geodetic  
65 input for our analyses is collected into the matrix  $P$  of size  $M \times N_t$ .

## 66 **S1.2 Seismic data**

67 We use two tremor catalogs. The first one spans the time period ranging from  
68 2005/01/09 to 2014/12/30 [8] (catalog #1). The second one is the Pacific Northwest  
69 Seismic Network (PNSN, <https://pnsn.org>) tremor catalog that starts on 2009/08/06  
70 and is daily updated [9, 10]. The PNSN catalog is in fact made of two catalogs. With  
71 the implementation of an updated detection algorithm capable of providing also esti-  
72 mates of the tremor magnitude, all the seismic waveforms have been reprocessed by [9]  
73 starting from 2017-01-01. Such an algorithm is still used today to update the catalog.  
74 According to [9], when processing waveforms with both algorithms, the new procedure  
75 produced 55% more detections than the old one. When downloading data from the  
76 PNSN portal, only the new version is available starting from 2017/01/01. So, we have

77 a first PNSN catalog pre-2017 (catalog #2) and a second PNSN catalog post-2017  
78 (catalog #3).

79 Since the magnitude is not provided for all the events, we cannot use the moment  
80 rate (or slip potency rate). From the study of post-seismic sequences, it is well known  
81 that the cumulative number of aftershocks after a mainshock relaxes over time like the  
82 afterslip, which is aseismic slip [11, 12]. It thus seems reasonable to use the number of  
83 tremors in one day as a proxy for the slip rate.

84 We handle the difference in detection capabilities of the three catalogs as follows.  
85 First, we reduce each catalog  $i$  to a tremors rate spatio-temporal matrix  $R_i$ , with the  
86 same number of spatial features as the number of patches  $M$ , and number of time-  
87 stamps equal to the total number of days spanned by the catalog. We merge the three  
88 catalogs and use catalog #1 until 2009/08/06, corresponding to the first date for which  
89 catalog #2 is available. We adjust the tremors rate  $R_i$  multiplying it by a factor  $\gamma_i$ .  
90 This factor is equal to 1 for catalog #3, which is the most recent and complete and  
91 is thus used as a reference. A direct comparison of the two PNSN catalogs shows no  
92 differences in epicentral density [9], so it seems appropriate to simply use a factor of  
93  $\gamma_2 = 1.55$  to account for the 55% extra detections of the new catalog. The factor  $\gamma_1$  is  
94 estimated comparing the tremor activities of the catalogs #1 and #2 for the period  
95 where both are available. We find the patches and times for which both catalogs have  
96 detections and calculate the ratio between the number of events of the catalog #2 and  
97 the number of events of the catalog #1. This allows us to refer catalog #1 to catalog  
98 #2. We then multiply this ratio by  $\gamma_2 = 1.55$  to refer catalog #1 to the reference  
99 catalog #3. We obtain a value of  $\gamma_1 = 5.7$ . We finally multiply the tremors rate (which  
100 we assumed to be proportional to the slip rate) by the area over which the tremors  
101 occurred to get a quantity proportional to the slip potency rate. We collect these  
102 values in a matrix  $R$  of size  $M \times N_t$ , and for brevity we refer to it as tremors rate  
103 even if it has been multiplied by an area.

104 From Figures 1c, 1e, and 1g we see that the catalog #1 does not have a detection  
 105 capability comparable to the other catalogs. This may limit our capabilities of finding  
 106 good seismo-geodetic analogs (see Section S4.3) for the period spanned by catalog #1.  
 107 A uniformly derived high-quality catalog would certainly be beneficial.

## 108 S2 Automatic SSEs catalog

109 To identify the most active segments of the Cascadia subduction, we implement an  
 110 automatic SSEs detection algorithm to build an SSE catalog. From this catalog, we  
 111 evaluate the moment released by each patch during an SSE, and thus the total moment  
 112 released over all experienced SSEs (Figure 1a).

113 The procedure goes as follows. We use three parameters to define an active  
 114 patch: two time-windows  $w$  and  $d$ , and an activation threshold  $\Delta P_{\text{threshold}}$ . At a  
 115 given time index  $n$ , we define a patch  $j$  as active if the average in the window  
 116  $w$  before  $n$  is significantly lower than the average in the window  $w$  after a time  
 117  $d$ . In practice, given the vector  $\mathbf{p}_{jn} = [P_{j\ n-w+1}, \dots, P_{jn}]$  we calculate its mean  
 118  $\mu_j^{(1)}(n)$  and standard deviation  $\sigma_j^{(1)}(n)$ , where the superscript (1) indicates that these  
 119 quantities refer to the first window  $w$ , the subscript  $j$  indicates the patch of inter-  
 120 est, and  $n$  is the time index of reference. We calculate the same quantities for the  
 121 vector  $\mathbf{p}_{j\ n+d+w} = [P_{j\ n+d+1}, \dots, P_{j\ n+d+w}]$ , and call them  $\mu_j^{(2)}(n)$  and  $\sigma_j^{(2)}(n)$ . If  
 122  $\mu_j^{(2)}(n) - 3\sigma_j^{(2)}(n) > \mu_j^{(1)}(n) + 3\sigma_j^{(1)}(n)$ , the patch is active at the time index  $n$ . This  
 123 provides a Boolean spatio-temporal matrix  $A$  of active patches. We then create a graph  
 124 to connect adjacent patches and use it to define SSEs. If a patch becomes active at  
 125 the time index  $n$ , we open an SSE instance that collects all patches that are active at  
 126 that time and that are adjacent to each other. If any of these adjacent patches was  
 127 already active, this is the continuation of an ongoing SSE. If none of the adjacent  
 128 patches was active, this is marked as a new SSE. At a given time index, we can have  
 129 multiple SSEs active if they are disjoint. If there are common patches between an SSE

130 at time  $n + 1$  and an SSE at time  $n$ , we keep the SSE active, otherwise we flag it as  
 131 terminated. This procedure so far provides a list of potential SSEs and gives tenta-  
 132 tive start and end time indices for each patch  $j$  in the SSE  $i$ . We indicate them with  
 133  $\tilde{n}_j^{(i) \text{ start}}$  and  $\tilde{n}_j^{(i) \text{ end}}$ , respectively. We further introduce a threshold criterion because  
 134 we may get several false detections. If during the period marked as active at least  
 135 one patch of those belonging to the SSE experienced a maximum variation in slip  
 136 potency larger than or equal to  $\Delta P_{\text{threshold}} = 5 \times 10^6 \text{ m}^3$  the SSE is kept, otherwise  
 137 the SSE is discarded. This threshold corresponds to a magnitude of  $\approx 5.4$  associated  
 138 with a single patch and allows us to remove spurious or very small and likely noisy  
 139 events. To better evaluate the start of the event, for each active patch we search for  
 140 the minimum of the slip potency in the window  $[\tilde{n}_j^{(i) \text{ start}} - w + 1, \tilde{n}_j^{(i) \text{ start}}]$ . For the  
 141 end of the event, we pick the time where the slip potency is maximum in the window  
 142  $[\tilde{n}_j^{(i) \text{ end}}, \tilde{n}_j^{(i) \text{ end}} + d + w]$ . We now have a collection of proposed SSEs. To account for  
 143 the possible coalescence of SSEs, we merge two SSEs if they share at least one patch  
 144 at a given time for which they are active.

145 The whole procedure is repeated “backward” in time. In fact, the active times in  
 146 the matrix  $A$  refer to the end of the first  $w$  window, and this may introduce a bias in  
 147 the start and end times. We thus repeat the procedure, but we flip the time series left-  
 148 right (to move backward in time) and up-down (so that we can still use the criterion  
 149  $\mu_j^{(2)}(n) - 3\sigma_j^{(2)}(n) > \mu_j^{(1)}(n) + 3\sigma_j^{(1)}(n)$  to determine the significance in the slip potency  
 150 difference between two time windows  $w$ ).

151 We finally combine the two lists of SSEs obtained with the forward and backward  
 152 analyses. In this step, we take all the events that are uniquely in the forward and  
 153 backward catalogs, plus we merge all the events that are shared between the two  
 154 catalogs.

155 Figure 1 shows the cumulative moment released by a given patch when summing  
 156 up the contributions from all the SSEs to which it participated between 2007/01/01

157 and the first available date in the prospective experiment, namely 2024/08/01. This  
158 allows us to get a segmentation for further analyses.

### 159 **S3 Physical intuition**

160 The fault portion experiencing SSEs shows a clear along-strike segmentation, with a  
161 Northern segment (between 47°N and 49°N) slipping more frequently than the central  
162 segment (between 44°N and 47°N) [1, 13, 14]. This difference in returning period may  
163 be due to the higher loading rate in the Northern portion and to the geometrical con-  
164 figuration of the megathrust, with a clear change in strike at about 47°N. Despite the  
165 lower convergence rate, the Southern segment (between 41°N and 44°N) is character-  
166 ized by more frequent events, but they are smaller and close to the noise level, possibly  
167 because frictional properties of the fault interface do not allow high concentration of  
168 stresses along this portion of the fault. We further notice that SSEs occur at a depth  
169 range of approximately 30-45 km [15]. These observations lead us to the segmentation  
170 proposed in Figure 1. See Section S2 for more details about the automatic detection  
171 of SSEs and the calculation of the total slip reported in Figure 1.

172 As a first approximation, we can imagine that each slipping segment is a spring-  
173 slider, connected to the other sliders and loaded by the long-term tectonic motion.  
174 Concatenated spring-sliders form a so-called Burridge-Knopoff (BK) model [16]. In the  
175 simplest case, with a simple velocity weakening friction law [17], the variables needed  
176 to fully characterize the state of the system are the slip with respect to the steady  
177 loading and the slip velocity of each block. We can multiply the slip and slip velocity  
178 by the corresponding slipping area to get the slip potency and slip potency rate [3],  
179 which are directly proportional to the seismic moment and moment rate in the case  
180 of constant shear modulus.

181 We do have the slip potency, but unfortunately, we do not have direct access to  
182 the slip potency rate. The slip potency derived from geodesy is too noisy to take

183 a reliable time derivative, and causal filtering would introduce time delays in the  
184 signal, detrimental for real-time applications. We exploit the fact that the cumulative  
185 number of events often correlates with the observed geodetic deformation [11, 12] (see  
186 also Section S1.2), and take the tremors rate as a proxy for the slip rate. We then  
187 multiply the tremors rate by the area over which the tremors occurred to get a quantity  
188 proportional to the slip potency rate.

189 [17] showed that a system made of two sliders coupled with a spring and governed  
190 by a velocity weakening friction law can undergo chaotic behavior, and hints of chaos  
191 have been detected for the Cascadia SSEs system [2]. The simple spring-slider model  
192 is to seismology as the Lorenz63 model is to atmospheric science [18]. And as natural  
193 occurring analogs can be used in atmospheric science to make weather forecasts [19]  
194 and study the characteristic patterns associated with extreme events [20], we start  
195 having a sufficient number of SSE cycles to apply similar methods to the study of fault  
196 frictional failure. Naturally occurring analogs are past states that are similar to the  
197 current state of the system, and in our case the state of the system is determined by  
198 the slip potency and the proxy of the slip potency rate derived from the tremors rate.

## 199 S4 Forecasting models

### 200 S4.1 Deterministic forecasting models

- 201 • **Persistence:** The future is equal to the last observed value, i.e.,  $\hat{P}_j^{(t)}(h) = P_{jN_t}^{(t)}$   
202 and  $\Delta \hat{M}_{0jt}(h) = 0$ .
- 203 • **Expectance:** We collect all time windows of length  $h$  in the past observations and  
204 we take their average to get the expected evolution of the next time window of length  
205  $h$ . This gives a value around 0 as expected, since we are using detrended data. This  
206 can be seen as a climatological model in atmospheric science, where the expected  
207 value is the average of past observations. Since we do not have a well defined period  
208 or season, we simply take the expected value of past observations.

- 209 • **Persistent rate:** The future is obtained as an extrapolation of the best linear fit  
 210 performed over the past 7 days, with the idea of trying to capture the onset of a  
 211 rupture:  $\hat{P}_j^{(t)}(h) = P_{jN_t}^{(t)} + h\dot{P}_j^{(t)}_{N_t-7:N_t}$  where  $\dot{P}_j^{(t)}_{N_t-7:N_t}$  indicates the slope of the  
 212 best linear fit for patch  $j$  in the time window  $[N_t - 7, N_t]$ .
- 213 • **Auto-Regressive (AR):** We exploit the fact that the slip potency is obtained via  
 214 an independent component (IC) analysis and fit the best AR model to the inverted  
 215 ICs. The optimal order of the AR model is automatically selected via the corrected  
 216 Akaike Information Criterion, and the maximum order is set to 21, i.e. we use  
 217 maximum the past 3 weeks of data. We use the Julia implementation in the package  
 218 StateSpaceModels.jl [21].

## 219 S4.2 Probabilistic forecasting model

220 We implement a Brownian Passage Time (BPT) model [22]. It is derived from the  
 221 Brownian oscillator: a 1-dimensional stochastic differential equation with constant  
 222 loading rate perturbed by a Wiener process. When the state of the system (in this  
 223 case representative of the stress on the fault) hits a fixed failure value, the state drops  
 224 to a fixed ground level. With no perturbations, the state is represented by a periodic  
 225 saw-tooth pattern. The higher the perturbation, the higher the aperiodicity, typically  
 226 measured via the coefficient of variation  $\alpha$ . This is defined as the ratio between the  
 227 standard deviation ( $\sigma_{\text{BPT}}$ ) and the average ( $\mu_{\text{BPT}}$ ) of the recurrence time  $T_{\text{recurrence}}$ .  
 228 The recurrence time is defined as the time elapsed from a drop in the state (i.e., an  
 229 event) to the next. For every segment, we define an occurrence of an event as a moment  
 230 in time for which in the next  $h$  days the segment released a magnitude larger than  
 231  $\tilde{M}_w$ . Once an event time is detected, the search for the next event skips the following  
 232  $w = 90$  days, meaning that we accept only recurrence times larger than  $w$ . This seems  
 233 a reasonable assumption, given that the returning time of SSEs in Cascadia has been  
 234 previously identified between 8 and 22 months [14], and it allows us to keep just the  
 235 onset of a failure.

236 For every day  $t$  for which a solution is available, we estimate the recurrence time  
 237 for each segment for a set of threshold magnitudes  $\tilde{M}_w$  ranging from 6.0 to 6.5, equally  
 238 spaced every 0.1 points of magnitude. This means that, with the new information  
 239 coming in at time  $t$ , we reevaluate the recurrence time and adjust the corresponding  
 240 mean and coefficient of variation. We finally calculate the elapsed time since the last  
 241 event larger than  $\tilde{M}_w$  and we refer to it with the symbol  $\tau_{\text{BPT}}$ .

242 The cumulative distribution function of the inverse Gaussian distribution  
 243  $f(x; \mu_{\text{BPT}}, \lambda_{\text{BPT}})$  with mean  $\mu_{\text{BPT}}$  and shape parameter  $\lambda_{\text{BPT}} = \mu_{\text{BPT}}/\alpha^2$  gives the  
 244 probability that failure will have occurred by the time  $\tau_{\text{BPT}}$ :

$$245 \quad \text{Prob}(T_{\text{failure}} \leq \tau_{\text{BPT}}) = F(\tau_{\text{BPT}}) = \int_0^{\tau_{\text{BPT}}} f(x; \mu_{\text{BPT}}, \lambda_{\text{BPT}}) dx \quad (\text{S1})$$

246 We can use the information that failure did not occur until now, i.e. in the time  
 247  $\tau_{\text{BPT}}$  after the last event, to estimate the conditional probability of having a failure  
 248 in the next  $h$  time span:

$$249 \quad \text{Prob}(T_{\text{failure}} \leq \tau_{\text{BPT}} + h | T_{\text{failure}} > \tau_{\text{BPT}}) = \frac{F(\tau_{\text{BPT}} + h) - F(\tau_{\text{BPT}})}{1 - F(\tau_{\text{BPT}})} \quad (\text{S2})$$

250 Since we have  $\mu_{\text{BPT}}$ ,  $\lambda_{\text{BPT}}$ ,  $\tau_{\text{BPT}}$ , and  $h$ , we can calculate this probability, which  
 251 will constitute the baseline for our probabilistic forecast assessment.

### 252 S4.3 Naturally occurring analogs (NOA) forecasting models

253 To define naturally occurring analogs we need to declare which observables we use to  
 254 characterize the state of the system. Inspired by the ideas delineated in the Section S3,  
 255 we test four different cases:

- 256 • **Global geodesy (abbreviation: gl g)**: We search for analogs of  $P$  over the whole  
 257 fault, with similar states (i.e., analogs) defined as those points during the past such  
 258 that their Euclidean distance from the last column of  $P$  is in the bottom 1%.

- 259 • **Global seismo-geodesy (abbreviation: gl sg)**: As for the global geodesy case,  
 260 but now we search for small distances with respect to the vector made of both the  
 261 normalized slip potency and the normalized tremor rate times area at time  $N_t$ . For  
 262 each dataset, we use a min-max normalization approach for each patch.
- 263 • **Segmented geodesy (abbreviation: seg g)**: Given the 30 segments  
 264 (Figure 1 and Section S3), for each segment  $i$  we search for analogs of  
 265  $\left[ P_{\mathcal{A}_i^{-1} N_t}, P_{\mathcal{A}_i N_t}, P_{\mathcal{A}_i^{+1} N_t} \right]^T$ , where  $\mathcal{A}_i^{-1}$  and  $\mathcal{A}_i^{+1}$  indicate the areas of the along-  
 266 strike neighbor segments. If the segment  $i$  is at the extreme North or South, i.e. it  
 267 does have only one neighbor along-strike, we reduce the vector to 2-dimension.
- 268 • **Segmented seismo-geodesy (abbreviation: seg sg)**: As  
 269 for the segmented geodesy case, but we search for analogs of  
 270  $\left[ \tilde{P}_{\mathcal{A}_i^{-1} N_t}, \tilde{P}_{\mathcal{A}_i N_t}, \tilde{P}_{\mathcal{A}_i^{+1} N_t}, \tilde{R}_{\mathcal{A}_i^{-1} N_t}, \tilde{R}_{\mathcal{A}_i N_t}, \tilde{R}_{\mathcal{A}_i^{+1} N_t} \right]^T$ , where  $\tilde{P}$  and  $\tilde{R}$  indicate  
 271 the normalized slip potency and tremors rate times area. Time series associated  
 272 with each segment are individually normalized using a min-max normalization.

273 The only hyper-parameter involved is the number of analogs to retain. We set it  
 274 to 1% of  $N_t$ , a value already successfully used in various geophysical contexts when  
 275 searching for analogs in daily data to study extreme events with recurrence times of  
 276 similar duration as the ones considered here [2, 23]. To avoid using highly correlated  
 277 recent states, we automatically select a Theiler window via the first zero of the auto-  
 278 correlation function [24]. Compared to an AR approach, we have the advantage that  
 279 we can look as far back as data allows, so that we have recent information via the  
 280 present state and past information via the analogs at a sufficient distance back in time  
 281 to avoid recent high correlations.

## 282 S5 Evaluation metrics

283 For deterministic forecasts, we use the Mean Absolute Error (MAE) between  
 284  $\Delta \hat{M}_{0 \mathcal{A}t}(h)$  and  $\Delta M_{0 \mathcal{A}t}(h)$ , with  $t = 1, \dots, T - h$ . We also split the times  $t =$

285  $1, \dots, T - h$  into active and inactive periods, to evaluate the performance separately.  
 286 An active time is defined as a day such that  $\Delta M_{0 \mathcal{A}}(h) > \tilde{M}_0$ , where  $\tilde{M}_0$  is a threshold  
 287 moment corresponding to a desired threshold magnitude  $\tilde{M}_w$ . This allows us to also  
 288 evaluate the confusion matrix and associated quantities like precision, recall, accu-  
 289 racy, and F1-score. For a given segment, the confusion matrix depends on the decided  
 290 moment threshold  $\tilde{M}_0$  and on the forecasting horizon  $h$ . A day is a true positive if  
 291 both  $\Delta M_{0 \mathcal{A}}(h) > \tilde{M}_0$  and  $\Delta \hat{M}_{0 \mathcal{A}}(h) > \tilde{M}_0$ , a true negative if  $\Delta M_{0 \mathcal{A}}(h) \leq \tilde{M}_0$  and  
 292  $\Delta \hat{M}_{0 \mathcal{A}}(h) \leq \tilde{M}_0$ , a false positive if  $\Delta M_{0 \mathcal{A}}(h) \leq \tilde{M}_0$  and  $\Delta \hat{M}_{0 \mathcal{A}}(h) > \tilde{M}_0$ , and a  
 293 false negative if  $\Delta M_{0 \mathcal{A}}(h) > \tilde{M}_0$  and  $\Delta \hat{M}_{0 \mathcal{A}}(h) \leq \tilde{M}_0$ . We recognize that there is  
 294 a severe class imbalance, with many inactive times and few active times. This may  
 295 lead to artificially high accuracy values. For example, for the Northern segment and  
 296  $\tilde{M}_w = 6.3$  we find an accuracy larger than 90% for all tested forecasting horizons and  
 297 for all models except the persistent rate one. This shows that even the persistence  
 298 model, which gives no alarms at all, can get a very high accuracy, simply because of  
 299 the large proportion of inactive times.

300 Furthermore, according to this definition of active and inactive times, we will have  
 301 multiple days in a row labelled as active, even if the SSE is still the same and is  
 302 unraveling over several weeks. This may lead to artificially low recall values. Taking  
 303 once again the Northern segment and  $\tilde{M}_w = 6.3$ , we find that the expectation model  
 304 is the one with the highest recall, with a maximum value of 32% for  $h = 21$  days.  
 305 Among the non-trivial models, the segmented seismo-geodesy one obtains the highest  
 306 recall, with values ranging between 6.2% to 21%. We realize that these small values  
 307 are artificially low because of our definition of active times. Since we have only two  
 308 SSEs in the tested period, remembering that the recall is given by the ratio between  
 309 the number of retrieved events over the total number of events, we should expect only  
 310 recall values of 0%, 50% or 100%. Having a value of 21% does not mean that we identify  
 311 only about 1 SSE every 5. In fact, both events have been correctly identified at all

312 forecasting horizons, as shown in Figure 4. But not all active times have been correctly  
313 identified (only about one in five active times in the best case). A more appropriate  
314 estimation of the goodness of a model can be obtained with probabilistic forecasts,  
315 and not just binary evaluations of the presence or absence of an event. Since we also  
316 have an ensemble forecast via the analogs approach, we can estimate the probability  
317 of having a certain slip potency in the future (see Movie S1), or the probability of  
318 having a magnitude larger than a certain desired alarm threshold in the next  $h$  days  
319 (Figure 4). To evaluate the goodness of a probabilistic forecast, we use the Brier score  
320 for various levels of alarm magnitude threshold.

321 We evaluate the skill score of every model against a baseline model. We define the  
322 skill score (SS) as:

$$323 \quad \text{SS}_{\text{metric}}(\text{model}, \text{ref}) = 1 - \frac{\text{metric}(\text{model})}{\text{metric}(\text{ref})} \quad (\text{S3})$$

324 where metric is MAE for deterministic models and Brier for probabilistic models,  
325 model is one of the forecasting methods listed before (see Section S4), and ref is the  
326 specific reference model to compare the tested model against.

## 327 **S6 Figures**

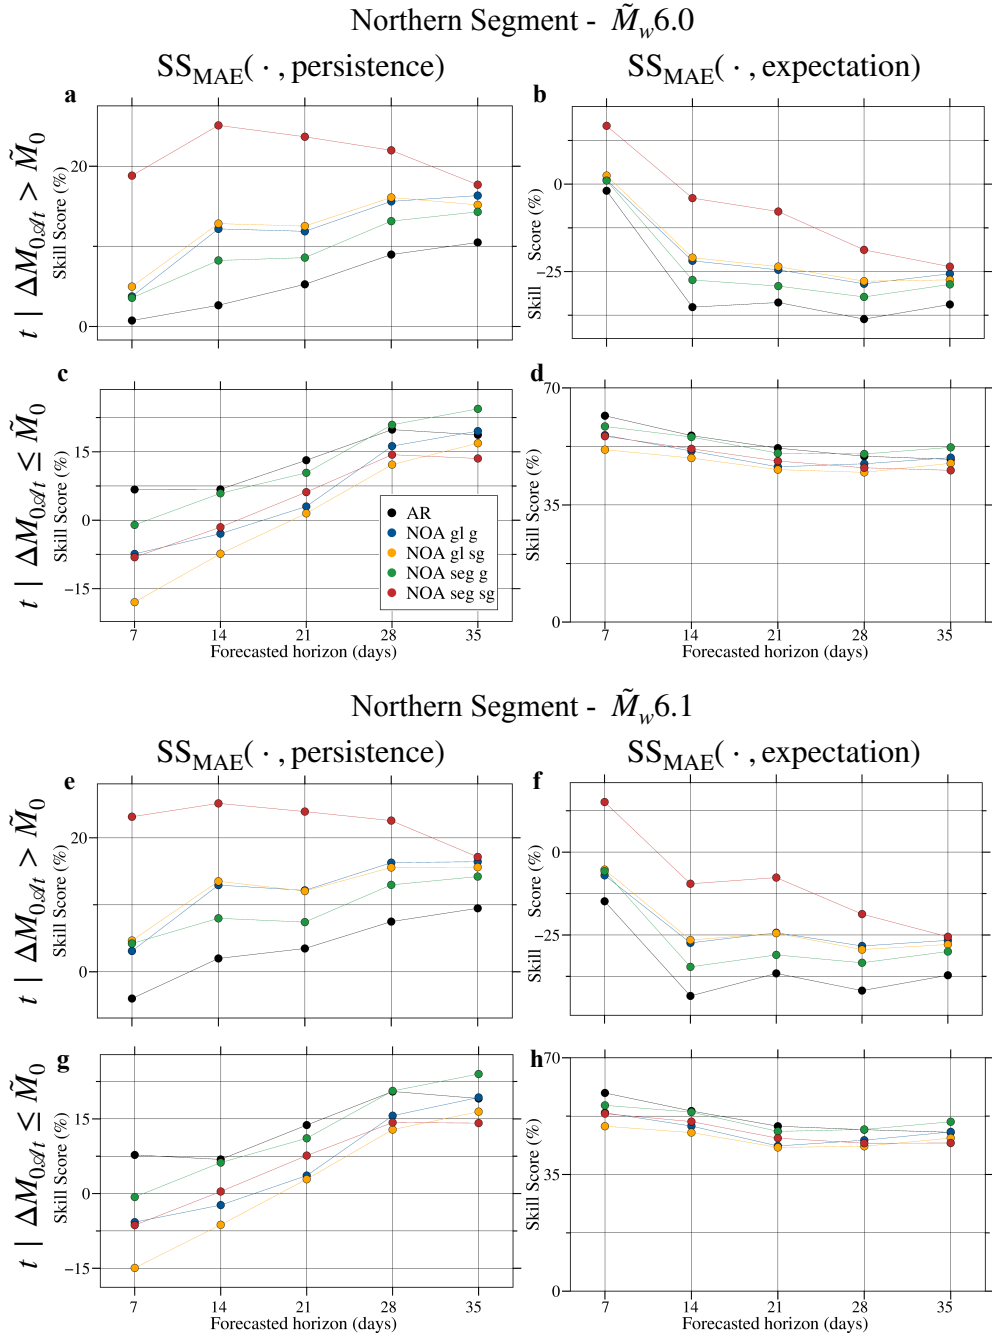

**Fig. S1** As Figure 3 for the active and inactive times, but for  $\tilde{M}_w = 6.0$  (panels a-d) and  $\tilde{M}_w = 6.1$  (panels e-h).

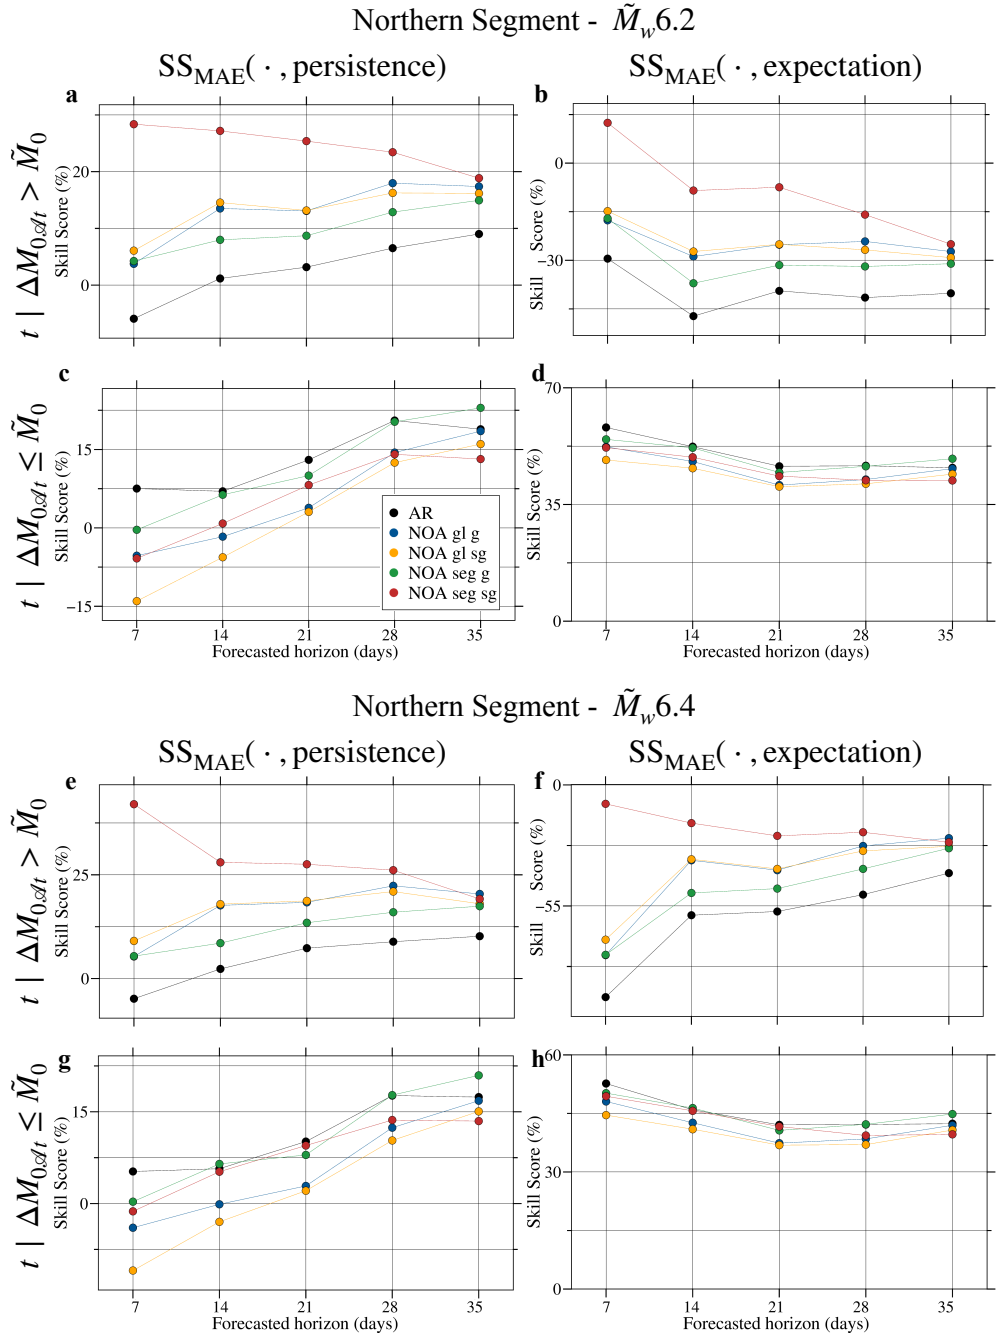

**Fig. S2** As Figure 3 for the active and inactive times, but for  $\tilde{M}_w = 6.2$  (panels a-d) and  $\tilde{M}_w = 6.4$  (panels e-h).

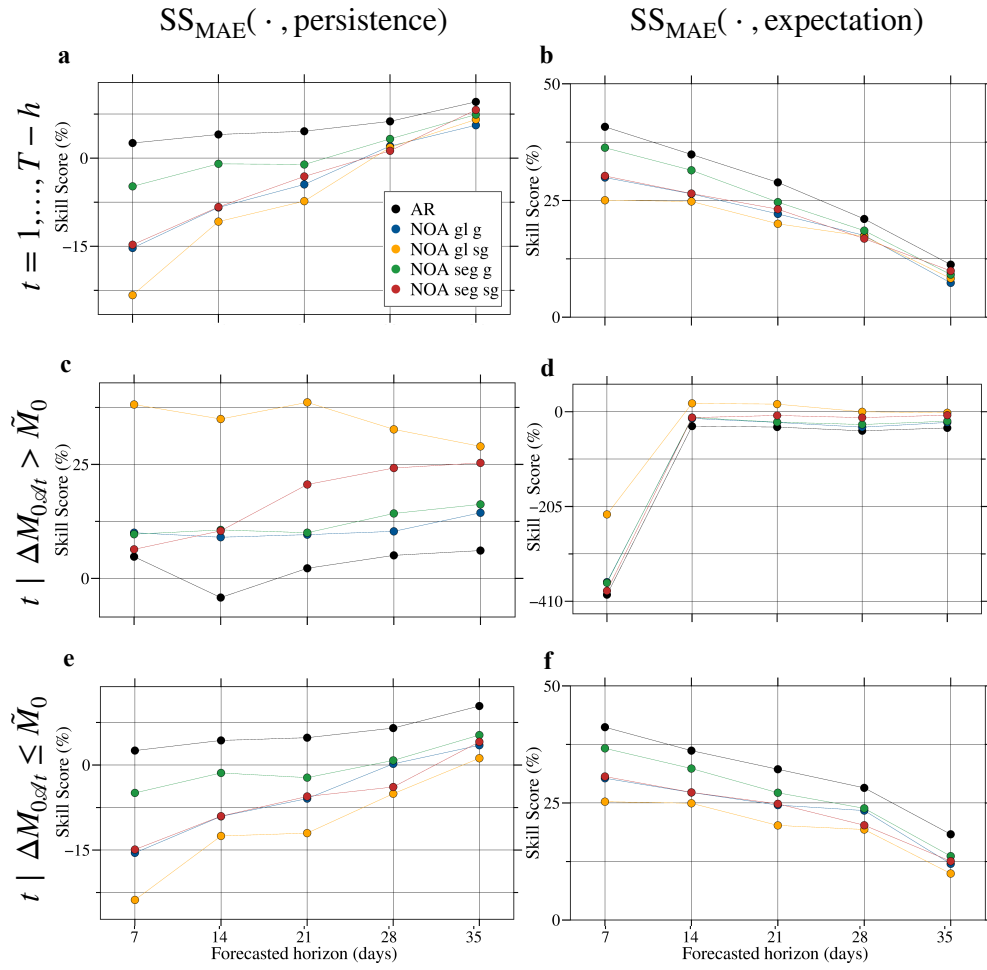

**Fig. S3** As Figure 3, but for the central segment and for  $\tilde{M}_w = 6.2$  because for  $h = 7$  days and  $h = 14$  days there were no active days when using  $\tilde{M}_w \geq 6.3$ .

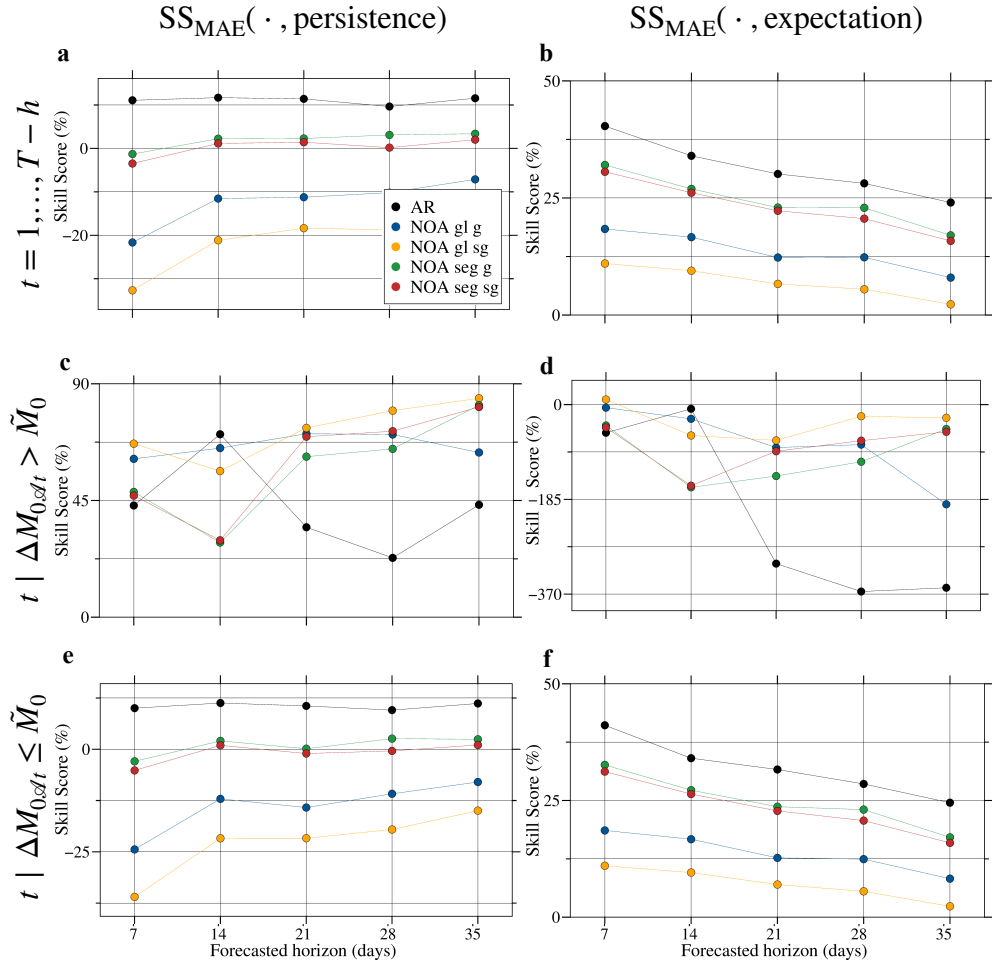

**Fig. S4** As Figure 3, but for the Southern segment and with  $\tilde{M}_w = 6.0$  because there were no active dates with  $\tilde{M}_w > 6.0$  for all tested forecasting horizons but  $h = 21$  days.

$\Delta M_{0\mathcal{A}t}$  and  $\Delta \hat{M}_{0\mathcal{A}t}$

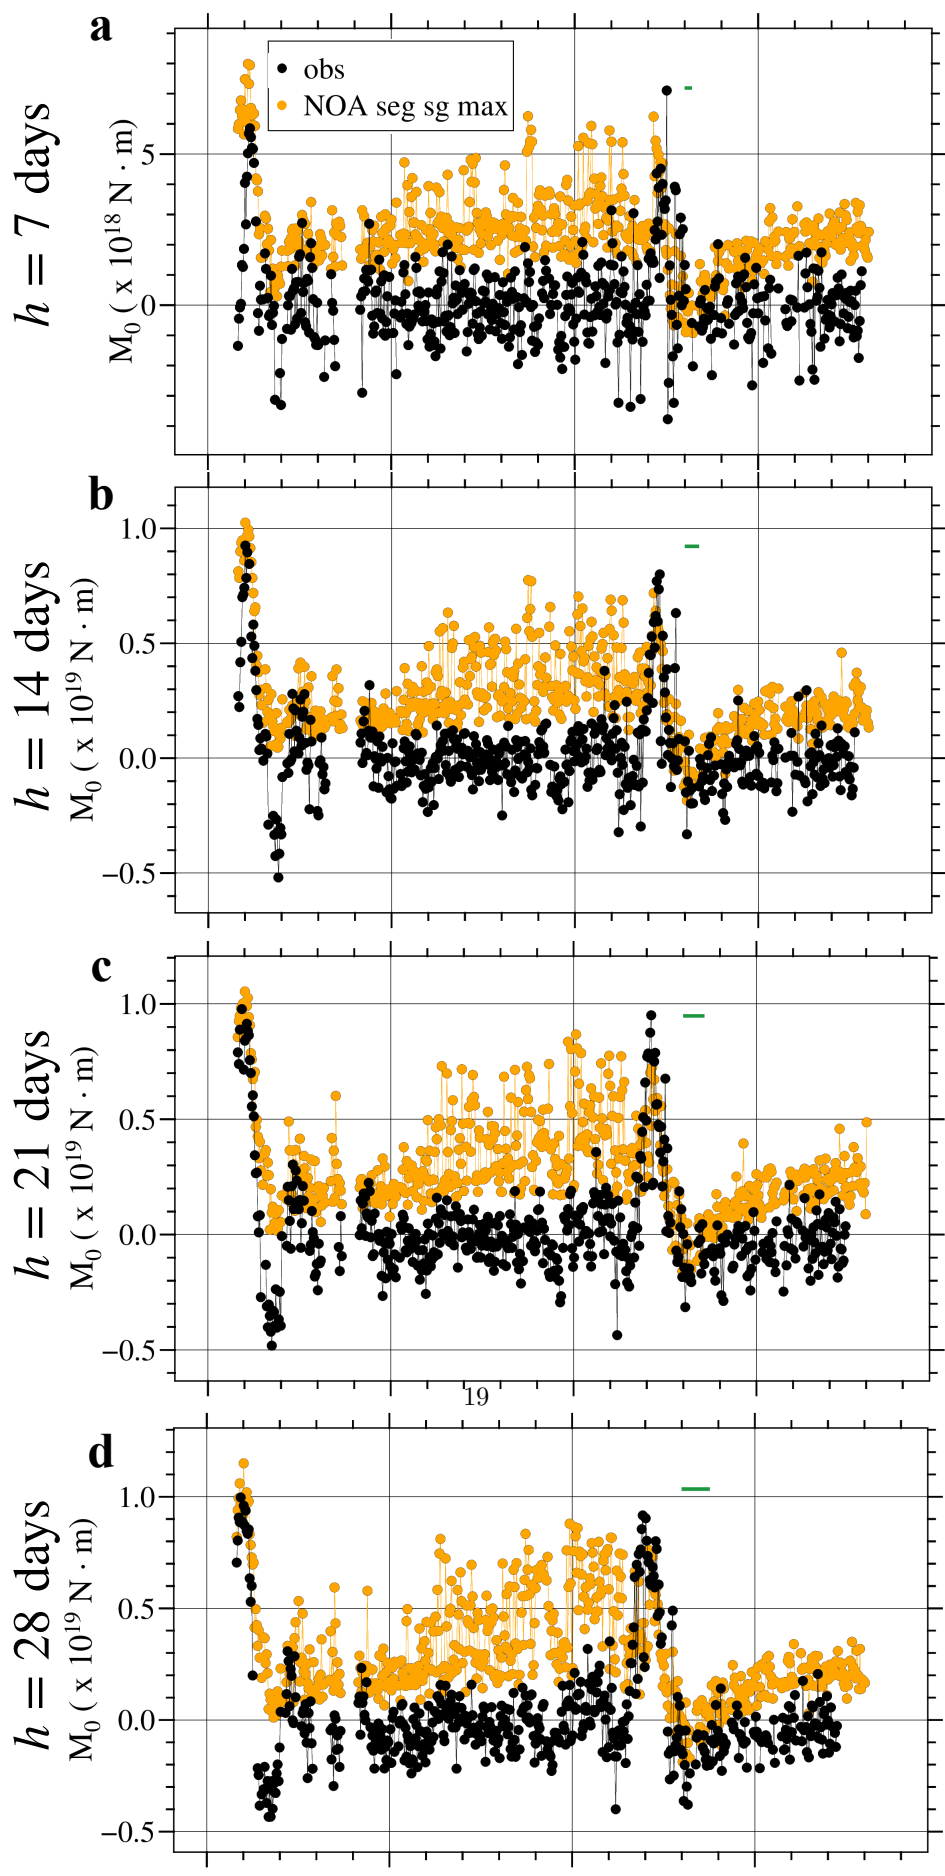

## S7 Tables

**Table S1** MAE skill score of each model vs. the persistence and expectation models for the Northern segment for various forecasted horizons. Non-negative skill scores are highlighted in bold, and for each forecasted horizon the value of the best performing model is underlined.

| Model           | Northern segment                       |             |             |            |            |                                        |            |            |            |            |
|-----------------|----------------------------------------|-------------|-------------|------------|------------|----------------------------------------|------------|------------|------------|------------|
|                 | SS <sub>MAE</sub> (model, persistence) |             |             |            |            | SS <sub>MAE</sub> (model, expectation) |            |            |            |            |
|                 | $h$ (days)                             |             |             |            |            | $h$ (days)                             |            |            |            |            |
|                 | 7                                      | 14          | 21          | 28         | 35         | 7                                      | 14         | 21         | 28         | 35         |
| Persistence     | -                                      | -           | -           | -          | -          | 47%                                    | 34%        | 22%        | 12%        | 14%        |
| Expectation     | -90%                                   | -51%        | -28%        | -13%       | -16%       | -                                      | -          | -          | -          | -          |
| Persistent rate | -140%                                  | -140%       | -140%       | -160%      | -210%      | -26%                                   | -58%       | -90%       | -130%      | -170%      |
| AR              | <u>4.5%</u>                            | <b>5.0%</b> | <b>9.3%</b> | <b>15%</b> | <b>15%</b> | <b>50%</b>                             | <b>37%</b> | <b>29%</b> | <b>25%</b> | <b>27%</b> |
| NOA gl g        | -3.3%                                  | <b>3.6%</b> | <b>7.3%</b> | <b>16%</b> | <b>18%</b> | <b>46%</b>                             | <b>36%</b> | <b>27%</b> | <b>26%</b> | <b>29%</b> |
| NOA gl sg       | -9.6%                                  | <b>1.3%</b> | <b>6.8%</b> | <b>14%</b> | <b>16%</b> | <b>42%</b>                             | <b>35%</b> | <b>27%</b> | <b>24%</b> | <b>28%</b> |
| NOA seg g       | <b>0.65%</b>                           | <b>6.9%</b> | <b>9.5%</b> | <b>17%</b> | <b>20%</b> | <b>48%</b>                             | <b>38%</b> | <b>29%</b> | <b>27%</b> | <b>31%</b> |
| NOA seg sg      | <b>1.7%</b>                            | <b>9.9%</b> | <u>15%</u>  | <u>18%</u> | <u>15%</u> | <b>48%</b>                             | <u>40%</u> | <b>33%</b> | <u>28%</u> | <b>27%</b> |

**Table S2** MAE skill score of each model vs. the persistence and expectation models for the Northern segment for various forecasted horizons for active times, defined using  $\tilde{M}_w = 6.3$ . Non-negative skill scores are highlighted in bold, and for each forecasted horizon the value of the best performing model is underlined.

| Model           | Northern segment                       |             |             |             |            |                                        |             |             |             |             |
|-----------------|----------------------------------------|-------------|-------------|-------------|------------|----------------------------------------|-------------|-------------|-------------|-------------|
|                 | SS <sub>MAE</sub> (model, persistence) |             |             |             |            | SS <sub>MAE</sub> (model, expectation) |             |             |             |             |
|                 | $h$ (days)                             |             |             |             |            | $h$ (days)                             |             |             |             |             |
|                 | 7                                      | 14          | 21          | 28          | 35         | 7                                      | 14          | 21          | 28          | 35          |
| Persistence     | -                                      | -           | -           | -           | -          | -54%                                   | -66%        | -54%        | -53%        | -56%        |
| Expectation     | <b>35%</b>                             | <b>40%</b>  | <b>35%</b>  | <b>35%</b>  | <b>36%</b> | -                                      | -           | -           | -           | -           |
| Persistent rate | -46%                                   | -25%        | -22%        | -25%        | -37%       | -120%                                  | -110%       | -87%        | -92%        | -110%       |
| AR              | -1.7%                                  | <b>2.0%</b> | <b>5.1%</b> | <b>7.0%</b> | <b>10%</b> | -57%                                   | -63%        | -46%        | -43%        | -40%        |
| NOA gl g        | <b>8.7%</b>                            | <b>16%</b>  | <b>15%</b>  | <b>19%</b>  | <b>19%</b> | -41%                                   | -39%        | -30%        | -24%        | <u>-26%</u> |
| NOA gl sg       | <b>13%</b>                             | <b>17%</b>  | <b>16%</b>  | <b>18%</b>  | <b>18%</b> | -34%                                   | -38%        | -30%        | -26%        | -28%        |
| NOA seg g       | <b>6.8%</b>                            | <b>8.6%</b> | <b>11%</b>  | <b>14%</b>  | <b>17%</b> | -44%                                   | -52%        | -37%        | -32%        | -30%        |
| NOA seg sg      | <b>37%</b>                             | <b>29%</b>  | <b>26%</b>  | <b>26%</b>  | <b>19%</b> | <u>2.5%</u>                            | <u>-17%</u> | <u>-14%</u> | <u>-14%</u> | <u>-26%</u> |

**Table S3** MAE skill score of each model vs. the persistence and expectation models for the Northern segment for various forecasted horizons for inactive times, defined using  $\tilde{M}_w = 6.3$ . Non-negative skill scores are highlighted in bold, and for each forecasted horizon the value of the best performing model is underlined.

| Model           | Northern segment                                                                                                              |             |             |            |            |                                                                                                                               |            |            |            |            |
|-----------------|-------------------------------------------------------------------------------------------------------------------------------|-------------|-------------|------------|------------|-------------------------------------------------------------------------------------------------------------------------------|------------|------------|------------|------------|
|                 | inactive times (i.e., $t \mid \Delta M_0 \mathcal{A}_t \leq \tilde{M}_0$ , with $\tilde{M}_0$ such that $\tilde{M}_w = 6.3$ ) |             |             |            |            | inactive times (i.e., $t \mid \Delta M_0 \mathcal{A}_t \leq \tilde{M}_0$ , with $\tilde{M}_0$ such that $\tilde{M}_w = 6.3$ ) |            |            |            |            |
|                 | SS <sub>MAE</sub> (model, persistence)                                                                                        |             |             |            |            | SS <sub>MAE</sub> (model, expectation)                                                                                        |            |            |            |            |
|                 | h (days)                                                                                                                      |             |             |            |            | h (days)                                                                                                                      |            |            |            |            |
|                 | 7                                                                                                                             | 14          | 21          | 28         | 35         | 7                                                                                                                             | 14         | 21         | 28         | 35         |
| Persistence     | -                                                                                                                             | -           | -           | -          | -          | 53%                                                                                                                           | 47%        | 37%        | 31%        | 31%        |
| Expectation     | -110%                                                                                                                         | -89%        | -58%        | -44%       | -46%       | -                                                                                                                             | -          | -          | -          | -          |
| Persistent rate | -160%                                                                                                                         | -190%       | -200%       | -240%      | -310%      | -20%                                                                                                                          | -51%       | -90%       | -130%      | -180%      |
| AR              | <b>5.7%</b>                                                                                                                   | <b>6.2%</b> | <b>11%</b>  | <b>19%</b> | <b>18%</b> | <b>56%</b>                                                                                                                    | <b>50%</b> | <b>44%</b> | <b>44%</b> | <b>43%</b> |
| NOA gl g        | -5.5%                                                                                                                         | -1.7%       | <b>3.3%</b> | <b>14%</b> | <b>17%</b> | <b>50%</b>                                                                                                                    | <b>46%</b> | <b>39%</b> | <b>40%</b> | <b>43%</b> |
| NOA gl sg       | -14%                                                                                                                          | -5.2%       | <b>2.5%</b> | <b>12%</b> | <b>15%</b> | <b>47%</b>                                                                                                                    | <b>44%</b> | <b>38%</b> | <b>39%</b> | <b>42%</b> |
| NOA seg g       | -0.49%                                                                                                                        | <b>6.2%</b> | <b>9.0%</b> | <b>19%</b> | <b>22%</b> | <b>53%</b>                                                                                                                    | <b>50%</b> | <b>43%</b> | <b>44%</b> | <b>46%</b> |
| NOA seg sg      | -4.7%                                                                                                                         | <b>1.9%</b> | <b>9.1%</b> | <b>13%</b> | <b>13%</b> | <b>51%</b>                                                                                                                    | <b>48%</b> | <b>43%</b> | <b>40%</b> | <b>41%</b> |

**Table S4** Brier skill score of each model vs. the BPT model for the Northern segment for various forecasted horizons for two threshold magnitudes,  $\tilde{M}_w = 6.1$  and  $\tilde{M}_w = 6.2$ . Non-negative skill scores are highlighted in bold, and for each forecasted horizon the value of the best performing model is underlined.

| Model           | Northern segment                                         |            |            |             |             |                                                          |            |             |             |             |
|-----------------|----------------------------------------------------------|------------|------------|-------------|-------------|----------------------------------------------------------|------------|-------------|-------------|-------------|
|                 | SS <sub>Brier</sub> (model, BPT) for $\tilde{M}_w = 6.1$ |            |            |             |             | SS <sub>Brier</sub> (model, BPT) for $\tilde{M}_w = 6.2$ |            |             |             |             |
|                 | h (days)                                                 |            |            |             |             | h (days)                                                 |            |             |             |             |
|                 | 7                                                        | 14         | 21         | 28          | 35          | 7                                                        | 14         | 21          | 28          | 35          |
| Persistence     | <b>14%</b>                                               | <b>14%</b> | <b>18%</b> | <b>21%</b>  | <b>31%</b>  | <b>4.6%</b>                                              | <b>3%</b>  | <b>2.6%</b> | -0.7%       | <b>8.6%</b> |
| Expectation     | -98%                                                     | -46%       | -2.1%      | <b>5.1%</b> | <b>9.4%</b> | -70%                                                     | -28%       | -20%        | <b>3.2%</b> | <b>2.7%</b> |
| Persistent rate | -260%                                                    | -240%      | -170%      | -180%       | -180%       | -360%                                                    | -260%      | -240%       | -250%       | -300%       |
| AR              | <b>14%</b>                                               | <b>14%</b> | <b>18%</b> | <b>23%</b>  | <b>33%</b>  | <b>4.6%</b>                                              | <b>3%</b>  | <b>2.6%</b> | -0.7%       | <b>8.6%</b> |
| NOA gl g        | <b>19%</b>                                               | <b>31%</b> | <b>34%</b> | <b>41%</b>  | <b>44%</b>  | <b>9.1%</b>                                              | <b>19%</b> | <b>20%</b>  | <b>24%</b>  | <b>26%</b>  |
| NOA gl sg       | <b>14%</b>                                               | <b>28%</b> | <b>33%</b> | <b>38%</b>  | <b>42%</b>  | <b>9.7%</b>                                              | <b>18%</b> | <b>18%</b>  | <b>20%</b>  | <b>22%</b>  |
| NOA seg g       | <b>20%</b>                                               | <b>26%</b> | <b>30%</b> | <b>40%</b>  | <b>48%</b>  | <b>7.9%</b>                                              | <b>13%</b> | <b>18%</b>  | <b>20%</b>  | <b>29%</b>  |
| NOA seg sg      | <b>34%</b>                                               | <b>37%</b> | <b>44%</b> | <b>46%</b>  | <b>42%</b>  | <b>30%</b>                                               | <b>31%</b> | <b>37%</b>  | <b>31%</b>  | <b>23%</b>  |

**Table S5** As Table S4, but for threshold magnitudes  $\tilde{M}_w = 6.3$  and  $\tilde{M}_w = 6.4$ .

| Model           | Northern segment                                         |              |             |             |             |                                                          |             |              |             |              |
|-----------------|----------------------------------------------------------|--------------|-------------|-------------|-------------|----------------------------------------------------------|-------------|--------------|-------------|--------------|
|                 | SS <sub>Brier</sub> (model, BPT) for $\tilde{M}_w = 6.3$ |              |             |             |             | SS <sub>Brier</sub> (model, BPT) for $\tilde{M}_w = 6.4$ |             |              |             |              |
|                 | h (days)                                                 |              |             |             |             | h (days)                                                 |             |              |             |              |
|                 | 7                                                        | 14           | 21          | 28          | 35          | 7                                                        | 14          | 21           | 28          | 35           |
| Persistence     | -17%                                                     | -42%         | -29%        | -21%        | -25%        | -20%                                                     | -2.4%       | -12%         | -11%        | -29%         |
| Expectation     | -39%                                                     | -18%         | <b>5.3%</b> | <b>16%</b>  | -1.4%       | -160%                                                    | <b>3.3%</b> | <b>0.00%</b> | <b>10%</b>  | -9.8%        |
| Persistent rate | -460%                                                    | -390%        | -300%       | -270%       | -420%       | -440%                                                    | -200%       | -200%        | -180%       | -320%        |
| AR              | -17%                                                     | -42%         | -29%        | -21%        | -25%        | -20%                                                     | -2.4%       | -12%         | -11%        | -29%         |
| NOA gl g        | -13%                                                     | -22%         | -7.4%       | <b>7.7%</b> | -2.0%       | -21%                                                     | <b>8%</b>   | <b>3.2%</b>  | <b>13%</b>  | -5.3%        |
| NOA gl sg       | -10%                                                     | -25%         | -11%        | <b>2.0%</b> | -12%        | -21%                                                     | <b>4.6%</b> | <b>1.2%</b>  | <b>7.9%</b> | -13%         |
| NOA seg g       | -15%                                                     | -28%         | -8.5%       | <b>3.0%</b> | <b>1.9%</b> | -20%                                                     | <b>4.8%</b> | <b>4.3%</b>  | <b>12%</b>  | <b>-1.4%</b> |
| NOA seg sg      | <b>18%</b>                                               | <b>0.75%</b> | <b>13%</b>  | <b>17%</b>  | -9.4%       | <b>3.7%</b>                                              | <b>17%</b>  | <b>20%</b>   | <b>21%</b>  | -7.4%        |

**Table S6** As Table S1, but for the central segment and with active times defined using  $\tilde{M}_w = 6.2$ .

| Model           | Central segment                        |             |             |             |             |                                        |            |            |            |             |
|-----------------|----------------------------------------|-------------|-------------|-------------|-------------|----------------------------------------|------------|------------|------------|-------------|
|                 | SS <sub>MAE</sub> (model, persistence) |             |             |             |             | SS <sub>MAE</sub> (model, expectation) |            |            |            |             |
|                 | $h$ (days)                             |             |             |             |             | $h$ (days)                             |            |            |            |             |
|                 | 7                                      | 14          | 21          | 28          | 35          | 7                                      | 14         | 21         | 28         | 35          |
| Persistence     | -                                      | -           | -           | -           | -           | <b>39%</b>                             | <b>32%</b> | <b>25%</b> | <b>16%</b> | <b>1.9%</b> |
| Expectation     | -65%                                   | -47%        | -34%        | -19%        | -1.9%       | -                                      | -          | -          | -          | -           |
| Persistent rate | -110%                                  | -130%       | -150%       | -170%       | -180%       | -29%                                   | -54%       | -88%       | -130%      | -170%       |
| AR              | <b>2.6%</b>                            | <b>4.0%</b> | <b>4.6%</b> | <b>6.2%</b> | <b>9.6%</b> | <b>41%</b>                             | <b>35%</b> | <b>29%</b> | <b>21%</b> | <b>11%</b>  |
| NOA gl g        | -15%                                   | -8.4%       | -4.5%       | <b>2.1%</b> | <b>5.6%</b> | <b>30%</b>                             | <b>26%</b> | <b>22%</b> | <b>18%</b> | <b>7.4%</b> |
| NOA gl sg       | -23%                                   | -11%        | -7.3%       | <b>1.8%</b> | <b>6.6%</b> | <b>25%</b>                             | <b>25%</b> | <b>20%</b> | <b>17%</b> | <b>8.3%</b> |
| NOA seg g       | -4.8%                                  | -0.97%      | -1.1%       | <b>3.3%</b> | <b>7.4%</b> | <b>36%</b>                             | <b>31%</b> | <b>25%</b> | <b>19%</b> | <b>9.1%</b> |
| NOA seg sg      | -15%                                   | -8.3%       | -3.1%       | <b>1.2%</b> | <b>8.2%</b> | <b>30%</b>                             | <b>26%</b> | <b>23%</b> | <b>17%</b> | <b>9.9%</b> |

**Table S7** As Table S2, but for the central segment and with active times defined using  $\tilde{M}_w = 6.2$ .

| Model           | Central segment                                                                                                                        |             |             |             |             |                                        |            |            |        |       |
|-----------------|----------------------------------------------------------------------------------------------------------------------------------------|-------------|-------------|-------------|-------------|----------------------------------------|------------|------------|--------|-------|
|                 | SS <sub>MAE</sub> (model, persistence)                                                                                                 |             |             |             |             | SS <sub>MAE</sub> (model, expectation) |            |            |        |       |
|                 | active times (i.e., $t \mid \Delta M_0 \mathcal{A}_t > \tilde{M}_0$ , with $\tilde{M}_0$ such that $\tilde{M}_w = 6.2$ )<br>$h$ (days) |             |             |             |             | $h$ (days)                             |            |            |        |       |
|                 | 7                                                                                                                                      | 14          | 21          | 28          | 35          | 7                                      | 14         | 21         | 28     | 35    |
| Persistence     | -                                                                                                                                      | -           | -           | -           | -           | -420%                                  | -26%       | -36%       | -49%   | -44%  |
| Expectation     | <b>81%</b>                                                                                                                             | <b>21%</b>  | <b>27%</b>  | <b>33%</b>  | <b>31%</b>  | -                                      | -          | -          | -      | -     |
| Persistent rate | -74%                                                                                                                                   | -1.5%       | -6%         | -15%        | -20%        | -800%                                  | -28%       | -44%       | -72%   | -72%  |
| AR              | <b>4.8%</b>                                                                                                                            | -4.2%       | <b>2.2%</b> | <b>5.1%</b> | <b>6.1%</b> | -400%                                  | -31%       | -33%       | -41%   | -35%  |
| NOA gl g        | <b>10%</b>                                                                                                                             | <b>9.0%</b> | <b>9.6%</b> | <b>10%</b>  | <b>14%</b>  | -370%                                  | -15%       | -23%       | -34%   | -23%  |
| NOA gl sg       | <b>38%</b>                                                                                                                             | <b>35%</b>  | <b>39%</b>  | <b>33%</b>  | <b>29%</b>  | -220%                                  | <b>18%</b> | <b>16%</b> | -0.23% | -2.3% |
| NOA seg g       | <b>9.7%</b>                                                                                                                            | <b>11%</b>  | <b>10%</b>  | <b>14%</b>  | <b>16%</b>  | -370%                                  | -13%       | -23%       | -28%   | -21%  |
| NOA seg sg      | <b>6.4%</b>                                                                                                                            | <b>10%</b>  | <b>21%</b>  | <b>24%</b>  | <b>25%</b>  | -390%                                  | -13%       | -8.3%      | -13%   | -7.6% |

**Table S8** As Table S3, but for the central segment and with inactive times defined using  $\tilde{M}_w = 6.2$ .

| Model           | Central segment                                                                                                                             |             |             |              |             |                                        |            |            |            |             |
|-----------------|---------------------------------------------------------------------------------------------------------------------------------------------|-------------|-------------|--------------|-------------|----------------------------------------|------------|------------|------------|-------------|
|                 | SS <sub>MAE</sub> (model, persistence)                                                                                                      |             |             |              |             | SS <sub>MAE</sub> (model, expectation) |            |            |            |             |
|                 | inactive times (i.e., $t \mid \Delta M_0 \mathcal{A}_t \leq \tilde{M}_0$ , with $\tilde{M}_0$ such that $\tilde{M}_w = 6.2$ )<br>$h$ (days) |             |             |              |             | $h$ (days)                             |            |            |            |             |
|                 | 7                                                                                                                                           | 14          | 21          | 28           | 35          | 7                                      | 14         | 21         | 28         | 35          |
| Persistence     | -                                                                                                                                           | -           | -           | -            | -           | <b>40%</b>                             | <b>33%</b> | <b>29%</b> | <b>23%</b> | <b>8.8%</b> |
| Expectation     | -66%                                                                                                                                        | -50%        | -40%        | -30%         | -9.7%       | -                                      | -          | -          | -          | -           |
| Persistent rate | -110%                                                                                                                                       | -130%       | -170%       | -200%        | -220%       | -29%                                   | -55%       | -90%       | -130%      | -190%       |
| AR              | <b>2.5%</b>                                                                                                                                 | <b>4.3%</b> | <b>4.8%</b> | <b>6.5%</b>  | <b>10%</b>  | <b>41%</b>                             | <b>36%</b> | <b>32%</b> | <b>28%</b> | <b>18%</b>  |
| NOA gl g        | -16%                                                                                                                                        | -9.1%       | -5.9%       | <b>0.21%</b> | <b>3.5%</b> | <b>30%</b>                             | <b>27%</b> | <b>25%</b> | <b>23%</b> | <b>12%</b>  |
| NOA gl sg       | -24%                                                                                                                                        | -13%        | -12%        | -5.1%        | <b>1.2%</b> | <b>25%</b>                             | <b>25%</b> | <b>20%</b> | <b>19%</b> | <b>9.9%</b> |
| NOA seg g       | -4.9%                                                                                                                                       | -1.4%       | -2.2%       | <b>0.81%</b> | <b>5.3%</b> | <b>37%</b>                             | <b>32%</b> | <b>27%</b> | <b>24%</b> | <b>14%</b>  |
| NOA seg sg      | -15%                                                                                                                                        | -9.0%       | -5.5%       | -3.9%        | <b>4.1%</b> | <b>31%</b>                             | <b>27%</b> | <b>25%</b> | <b>20%</b> | <b>13%</b>  |

**Table S9** As Table S1, but for the Southern segment and with active times defined using  $\tilde{M}_w = 6.0$ .

| Model           | Southern segment          |             |             |              |             |                           |             |             |             |             |
|-----------------|---------------------------|-------------|-------------|--------------|-------------|---------------------------|-------------|-------------|-------------|-------------|
|                 | SSMAE(model, persistence) |             |             |              |             | SSMAE(model, expectation) |             |             |             |             |
|                 | $h$ (days)                |             |             |              |             | $h$ (days)                |             |             |             |             |
|                 | 7                         | 14          | 21          | 28           | 35          | 7                         | 14          | 21          | 28          | 35          |
| Persistence     | -                         | -           | -           | -            | -           | <b>33%</b>                | <b>25%</b>  | <b>21%</b>  | <b>20%</b>  | <b>14%</b>  |
| Expectation     | -49%                      | -34%        | -27%        | -26%         | -16%        | -                         | -           | -           | -           | -           |
| Persistent rate | -98%                      | -130%       | -170%       | -220%        | -260%       | -33%                      | -69%        | -110%       | -160%       | -210%       |
| AR              | <b>11%</b>                | <b>12%</b>  | <b>11%</b>  | <b>9.6%</b>  | <b>12%</b>  | <b>40%</b>                | <b>34%</b>  | <b>30%</b>  | <b>28%</b>  | <b>24%</b>  |
| NOA gl g        | -22%                      | -12%        | -11%        | -10%         | -7.1%       | <b>18%</b>                | <b>17%</b>  | <b>12%</b>  | <b>12%</b>  | <b>8%</b>   |
| NOA gl sg       | -33%                      | -21%        | -18%        | -19%         | -14%        | <b>11%</b>                | <b>9.5%</b> | <b>6.6%</b> | <b>5.5%</b> | <b>2.3%</b> |
| NOA seg g       | -1.3%                     | <b>2.2%</b> | <b>2.3%</b> | <b>3.1%</b>  | <b>3.4%</b> | <b>32%</b>                | <b>27%</b>  | <b>23%</b>  | <b>23%</b>  | <b>17%</b>  |
| NOA seg sg      | -3.5%                     | <b>1.1%</b> | <b>1.4%</b> | <b>0.18%</b> | <b>2.0%</b> | <b>31%</b>                | <b>26%</b>  | <b>22%</b>  | <b>21%</b>  | <b>16%</b>  |

**Table S10** As Table S2, but for the Southern segment and with active times defined using  $\tilde{M}_w = 6.0$ .

| Model           | Southern segment                                                                                                          |            |            |            |            |                           |       |        |       |       |
|-----------------|---------------------------------------------------------------------------------------------------------------------------|------------|------------|------------|------------|---------------------------|-------|--------|-------|-------|
|                 | active times (i.e., $t \mid \Delta M_{0 \mathcal{A}t} > \tilde{M}_0$ , with $\tilde{M}_0$ such that $\tilde{M}_w = 6.0$ ) |            |            |            |            |                           |       |        |       |       |
|                 | SSMAE(model, persistence)                                                                                                 |            |            |            |            | SSMAE(model, expectation) |       |        |       |       |
|                 | $h$ (days)                                                                                                                |            |            |            |            | $h$ (days)                |       |        |       |       |
|                 | 7                                                                                                                         | 14         | 21         | 28         | 35         | 7                         | 14    | 21     | 28    | 35    |
| Persistence     | -                                                                                                                         | -          | -          | -          | -          | -170%                     | -270% | -530%  | -500% | -710% |
| Expectation     | <b>63%</b>                                                                                                                | <b>73%</b> | <b>84%</b> | <b>83%</b> | <b>88%</b> | -                         | -     | -      | -     | -     |
| Persistent rate | -68%                                                                                                                      | -66%       | -120%      | -59%       | -33%       | -360%                     | -510% | -1300% | -860% | -970% |
| AR              | <b>43%</b>                                                                                                                | <b>71%</b> | <b>35%</b> | <b>23%</b> | <b>43%</b> | -55%                      | -8.2% | -310%  | -360% | -360% |
| NOA gl g        | <b>61%</b>                                                                                                                | <b>65%</b> | <b>71%</b> | <b>70%</b> | <b>64%</b> | -6.0%                     | -28%  | -84%   | -78%  | -190% |
| NOA gl sg       | <b>67%</b>                                                                                                                | <b>56%</b> | <b>73%</b> | <b>80%</b> | <b>84%</b> | <b>9.9%</b>               | -60%  | -70%   | -23%  | -26%  |
| NOA seg g       | <b>48%</b>                                                                                                                | <b>29%</b> | <b>62%</b> | <b>65%</b> | <b>82%</b> | -41%                      | -160% | -140%  | -110% | -48%  |
| NOA seg sg      | <b>47%</b>                                                                                                                | <b>30%</b> | <b>70%</b> | <b>72%</b> | <b>81%</b> | -45%                      | -160% | -91%   | -70%  | -53%  |

**Table S11** As Table S3, but for the Southern segment and with inactive times defined using  $\tilde{M}_w = 6.0$ .

| Model           | Southern segment                                                                                                               |              |              |             |             |                           |             |             |             |             |
|-----------------|--------------------------------------------------------------------------------------------------------------------------------|--------------|--------------|-------------|-------------|---------------------------|-------------|-------------|-------------|-------------|
|                 | inactive times (i.e., $t \mid \Delta M_{0 \mathcal{A}t} \leq \tilde{M}_0$ , with $\tilde{M}_0$ such that $\tilde{M}_w = 6.0$ ) |              |              |             |             |                           |             |             |             |             |
|                 | SSMAE(model, persistence)                                                                                                      |              |              |             |             | SSMAE(model, expectation) |             |             |             |             |
|                 | $h$ (days)                                                                                                                     |              |              |             |             | $h$ (days)                |             |             |             |             |
|                 | 7                                                                                                                              | 14           | 21           | 28          | 35          | 7                         | 14          | 21          | 28          | 35          |
| Persistence     | -                                                                                                                              | -            | -            | -           | -           | <b>35%</b>                | <b>26%</b>  | <b>24%</b>  | <b>21%</b>  | <b>15%</b>  |
| Expectation     | -53%                                                                                                                           | -35%         | -31%         | -27%        | -18%        | -                         | -           | -           | -           | -           |
| Persistent rate | -99%                                                                                                                           | -130%        | -170%        | -230%       | -270%       | -30%                      | -69%        | -110%       | -160%       | -210%       |
| AR              | <b>10%</b>                                                                                                                     | <b>11%</b>   | <b>11%</b>   | <b>9.5%</b> | <b>11%</b>  | <b>41%</b>                | <b>34%</b>  | <b>32%</b>  | <b>29%</b>  | <b>25%</b>  |
| NOA gl g        | -24%                                                                                                                           | -12%         | -14%         | -11%        | -8.0%       | <b>19%</b>                | <b>17%</b>  | <b>13%</b>  | <b>12%</b>  | <b>8.2%</b> |
| NOA gl sg       | -36%                                                                                                                           | -22%         | -22%         | -20%        | -15%        | <b>11%</b>                | <b>9.6%</b> | <b>7.0%</b> | <b>5.5%</b> | <b>2.3%</b> |
| NOA seg g       | -3.0%                                                                                                                          | <b>2.0%</b>  | <b>0.13%</b> | <b>2.6%</b> | <b>2.4%</b> | <b>33%</b>                | <b>27%</b>  | <b>24%</b>  | <b>23%</b>  | <b>17%</b>  |
| NOA seg sg      | -5.2%                                                                                                                          | <b>0.94%</b> | -1.0%        | 0.41%       | <b>1.0%</b> | <b>31%</b>                | <b>26%</b>  | <b>23%</b>  | <b>21%</b>  | <b>16%</b>  |

## 329 S8 Movie

330 Observed vs. forecasted slip potency in the next  $h = 21$  days for the Northern segment.  
331 The blue dot indicates the last observed value (labelled as “present”). The black dots  
332 show the observed future evolution of the slip potency as per the solution retrieved 21  
333 days in the future. Green dots show the weighted mean of the analog-based segmented  
334 seismo-geodesy model. The green lines indicate the evolution of all analogs used (1%  
335 of  $N_t$ ). The hot colormap indicates the probability to have a certain value according  
336 to the evolution of the analogs used.

## 337 References

- 338 [1] Gualandi, A.: Near real-time cascadia slow slip events. *Geophysical Journal*  
339 *International* **242**, 1–14 (2025)
- 340 [2] Gualandi, A., Avouac, J.-P., Michel, S., Faranda, D.: The predictable chaos of  
341 slow earthquakes. *Sci. Adv.* **6**(27) (2020) <https://doi.org/10.1126/sciadv.aaz5548>
- 342 [3] Anghel, M., Ben-Zion, Y., Rico-Martinez, R.: Dynamical system analysis and  
343 forecasting of deformation produced by an earthquake fault. *Pure appl. geophys.*  
344 **161**, 2023–2051 (2004)
- 345 [4] Hasterok, D., Halpin, J., Collins, A., Hand, M., Kreemer, C., Gard, M., Glorie,  
346 S.: New maps of global geological provinces and tectonic plates. *Earth-Sci. Rev.*  
347 **231** (2022)
- 348 [5] Nikkhoo, M., Walter, T.: Triangular dislocation: an analytical, artefact-free  
349 solution. *Geophys. J. Int.* **201**, 1119–1141 (2015)
- 350 [6] Árnadóttir, T., Segall, P.: The 1989 loma prieta earthquake imaged from inversion  
351 of geodetic data. *J. Geophys. Res.* **99**, 21835–21855 (1994)

- 352 [7] Freymueller, J., King, N.E., Segall, P.: The co-seismic slip distribution of the  
353 landers earthquake. *Bull. seism. Soc. Am.* **84**, 646–659 (1994)
- 354 [8] Ide, S.: Variety and spatial heterogeneity of tectonic tremor worldwide. *Journal*  
355 *of Geophysical Research: Solid Earth* **117** (2012)
- 356 [9] Wech, A.G.: Cataloging tectonic tremor energy radiation in the cascadia subduc-  
357 tion zone. *Journal of Geophysical Research: Solid Earth* **126** (2021)
- 358 [10] Wech, A.G.: Interactive tremor monitoring. *Seismological Research Letters* **81**,  
359 664–669 (2010)
- 360 [11] Perfettini, H., Avouac, J.-P.: Postseismic relaxation driven by brittle creep: A  
361 possible mechanism to reconcile geodetic measurements and the decay rate of  
362 aftershocks, application to the chi-chi earthquake, taiwan. *J. Geophys. Res.*  
363 **109**(B02304) (2004) <https://doi.org/10.1029/2003JB002488>
- 364 [12] Gualandi, A., Liu, Z., Rollins, C.: Post-large earthquake seismic activities medi-  
365 ated by aseismic deformation processes. *Earth and Planetary Science Letters*  
366 **530**(115870) (2020) <https://doi.org/10.1016/j.epsl.2019.115870>
- 367 [13] Michel, S., Gualandi, A., Avouac, J.-P.: Interseismic coupling and slow slip events  
368 on the cascadia megathrust. *PAGEOPH* **176**, 3867–3891 (2019) [https://doi.org/](https://doi.org/10.1007/s00024-018-1991-x)  
369 [10.1007/s00024-018-1991-x](https://doi.org/10.1007/s00024-018-1991-x)
- 370 [14] Bartlow, N.: A long-term view of episodic tremor and slip in cascadia. *Geo-*  
371 *physical Research Letters* **47**(e2019GL085303) (2020) [https://doi.org/10.1029/](https://doi.org/10.1029/2019GL085303)  
372 [2019GL085303](https://doi.org/10.1029/2019GL085303)
- 373 [15] Behr, W.M., Bürgmann, R.: What’s down there? the structures, materials and  
374 environment of deep-seated slow slip and tremor. *Phil. Trans. R. Soc. A* **379**

- 375 (2021)
- 376 [16] Burridge, R., Knopoff, L.: Model and theoretical seismicity. *Bulletin of the*  
377 *Seismological Society of America* **57**, 341–371 (1967)
- 378 [17] Huang, J., Turcotte, D.L.: Evidence for chaotic fault inter- actions in the  
379 seismicity of the san andreas fault and nankai trough. *Nature* **348**, 234–236 (1990)
- 380 [18] Ghil, M.: A century of nonlinearity in the geosciences. *Earth and Space Science*  
381 **6**, 1007–1042 (2019)
- 382 [19] Lorenz, E.N.: Atmospheric predictability as revealed by naturally occurring  
383 analogs. *Journal of the Atmospheric Sciences* **26**, 636–646 (1969)
- 384 [20] Dong, C., Noyelle, R., Messori, G., Gualandi, A., Fery, L., Yiou, P., Vrac, M.,  
385 D’Andrea, F., Camargo, S.J., Coppola, E., Balsamo, G., Chen, C., Faranda, D.,  
386 Mengaldo, G.: Indo-pacific regional extremes aggravated by changes in tropical  
387 weather patterns. *Nature Geoscience* **17**, 979–986 (2014)
- 388 [21] Saavedra, R., Bodin, G., Souto, M.: Statespacemodels.jl: a julia package for time-  
389 series analysis in a state-space framework. arXiv (2020) [https://doi.org/10.48550/  
390 arXiv.1908.01757](https://doi.org/10.48550/arXiv.1908.01757)
- 391 [22] Matthews, M.V., Ellsworth, W.L., Reasenber, P.A.: A brownian model for  
392 recurrent earthquakes. *Bulletin of the Seismological Society of America* **92**(6),  
393 2233–2250 (2002)
- 394 [23] Faranda, D., Messori, G., Yiou, P.: Dynamical proxies of north atlantic pre-  
395 dictability and extremes. *Scientific Reports* **7**(41278) (2017) [https://doi.org/10.  
396 1038/srep41278](https://doi.org/10.1038/srep41278)
- 397 [24] Theiler, J.: Spurious dimension from correlation algorithms applied to limited
